# Supplementary material
Source: PubMed Central journal article supplement (PMC3761307)
Supplement: 1ccd1ce62c7b7e50eb4784c72d72a144_genetics.113.152330-12.pdf [file 1ccd1ce62c7b7e50eb4784c72d72a144_genetics.113.152330-12.pdf]

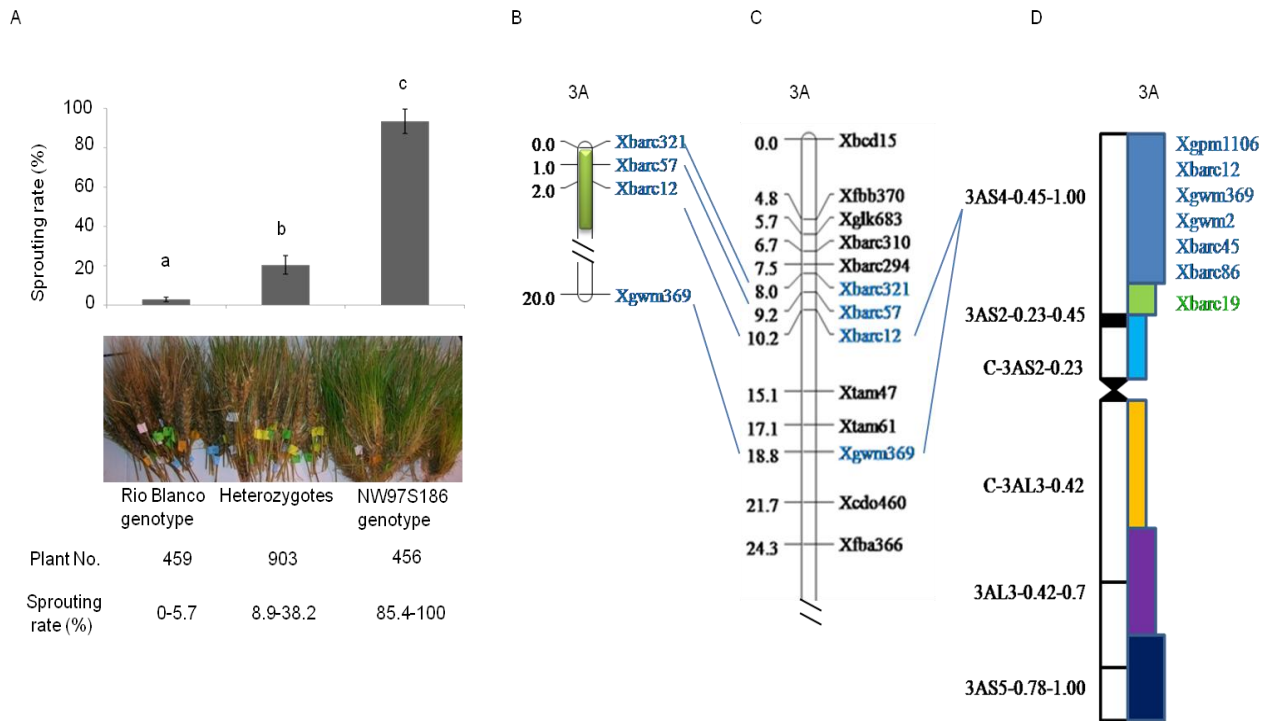

**Figure S1** Linkage and physical maps of *Qphs.pseru-3AS*. (A) Segregation of sprouting resistance in the near-isogenic recombinant population. Plants with Rio Blanco genotypes at the three marker loci, *Xbarc321*, *Xbarc57*, *Xbarc12*, were highly sprouting resistant; the heterozygous plants were moderately resistant; plants with all three NW97S186 marker alleles were highly susceptible. Error bar denotes standard deviation, a, b and c indicate significant difference at  $P < 0.01$ . (B) The QTL map of *Qphs.pseru-3AS* was developed using two recombinant inbred populations derived from Rio Blanco/NW97S186 and Rio Blanco/NW97S078 (17). The green bar represents the QTL interval on the short arm of chromosome 3A (3AS). (C) The four SSR markers (*Xbarc321*, *Xbarc57*, *Xbarc12*, and *Xgwm369*) close to *Qphs.pseru-3AS* show similar order and genetic distance in another map (Song *et al.*, 2005). (D) Physical map of 3A (Sourdille *et al.*, 2004). Two of the four SSR markers (*Xbarc12*, *Xgwm369*) close to *Qphs.pseru-3AS* are located in the deletion bin 3AS4-0.45-1.00 at the distal end of 3AS.

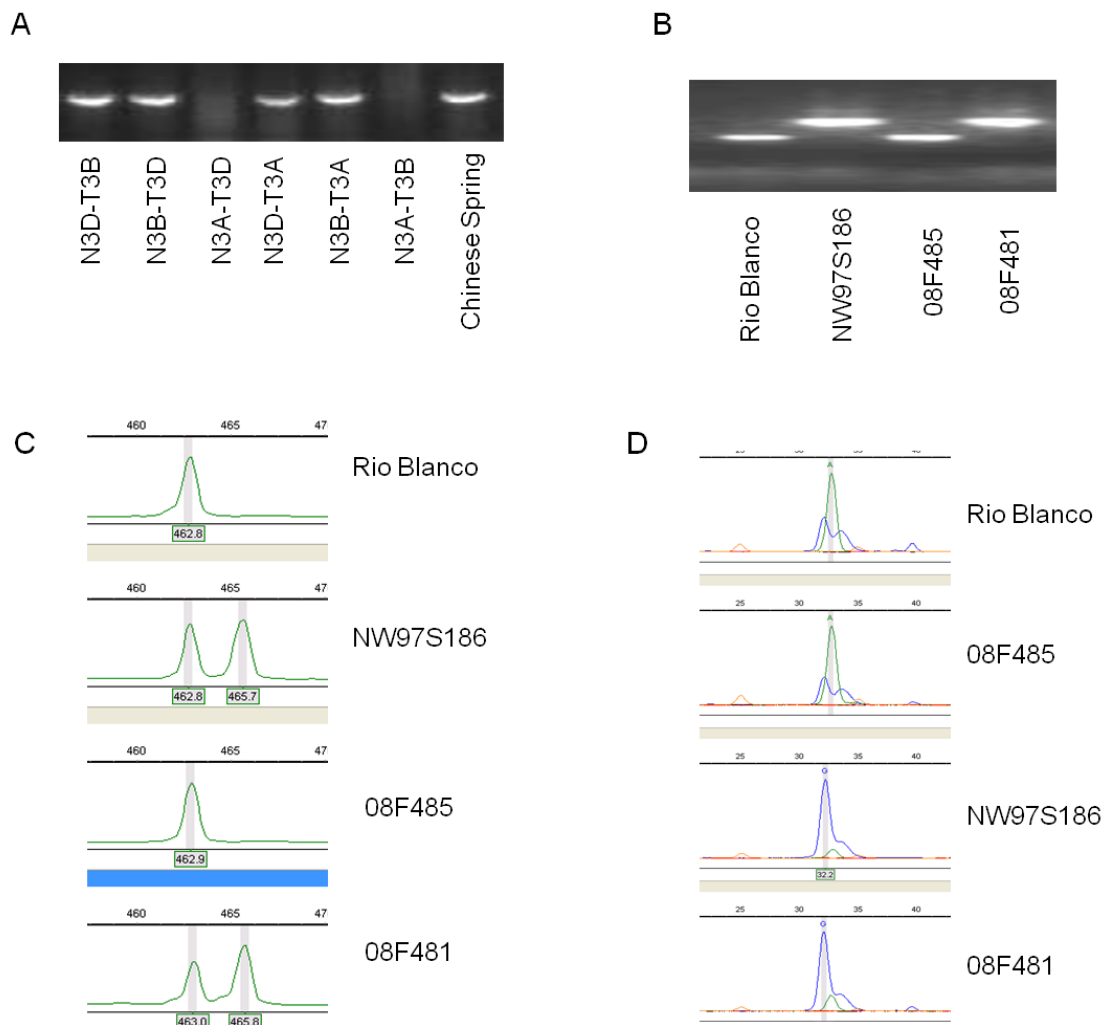

**Figure S2** Markers used to determine the chromosome location of *Qphs.pseru-3AS*. (A) An agarose gel image shows *TaPHS1* specific primers amplified only in Chinese Spring nulli-tetrasomic lines carrying 3A chromosome. No PCR product was amplified when the 3A chromosome was replaced by 3B (N3A-T3B) or 3D (N3A-T3D). (B) An agarose gel image shows an STS marker developed from the wheat EST BE423484 and detected polymorphism between the resistant genotypes (Rio Blanco and 08F485) and the susceptible genotypes (NW97S186 and 08F481). (C) An electropherogram of polymorphic STS marker developed from the EST CA654295 analyzed using capillary electrophoresis in an ABI 3730 DNA analyzer. (D) An electropherogram of an SNP marker developed by re-sequencing wheat EST CD910417 analyzed using SNPshot in an ABI 3730 DNA analyzer.

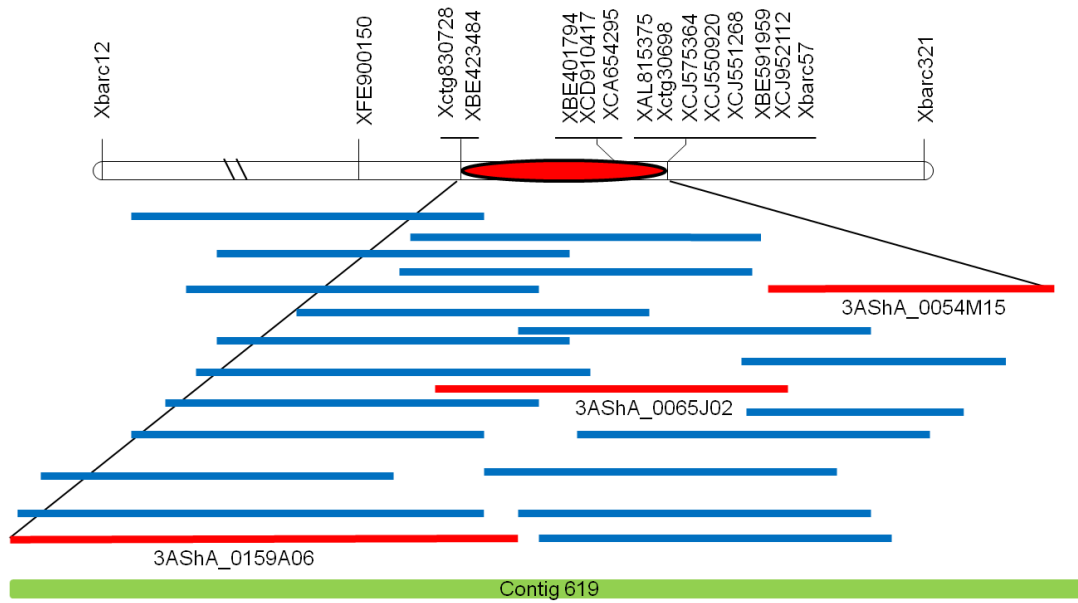

**Figure S3** BAC contig Ctg619 (bottom solid bar) spans the entire *Qphs.pseru-3AS* region. Top bar is the linkage map of *Qphs.pseru-3AS* with the *Qphs.pseru-3AS* region labeled by red oval. Solid bars between the linkage map and the contig bar are different BACs in the contig. Three BACs with red color that cover the entire QTL region were selected for sequencing to identify candidate genes for *TaPHS1*.

```

GRMZM2G021614 -----MARFVDPLVVGGRVIGEVVDLFVPSISMTVAYDGPKDISNGCL 42
Sb03g8270 -----MARFVDPLVVGGRVIGEVVDLFVPSISMTVAY-GPKDISNGCL 41
GRMZM2G152689 -----MARFVDPLVVGGRVIGEVVDLFVPSVSMTVAY-GPKDISNGCL 41
GRMZM2G059358 -----MARFVDPLVVGGRVIGEVVDLFVPSVSMTVAY-GPKDISNGCL 41
Os01g02120 -----MARFVDPLVVGGRVIGEVVDLFVPSISMTAAY-GDRDISNGCL 41
HvMFT -----RSSEKEEEEEERNIYNGDMSRCDPLVVGGRVIGEVVDMFVPSVAMAVAY-GARDLSNGCH 59
Qphs.pseru-3AS -----MSRFVDPLVVGGRVIGEVVDMFVPSVAMAVAY-GARDLSNGCH 41
Bradi2g01020 -----MSRFVDPLVVGGRVIGEVVDMFVPSVAMAVAY-GPKDISNGCH 41
Os06g30370 -----MASHVDPLVVGGRVIGDVEDLVFPPTAMSVRF-GTKDLTNGCE 41
At01g18100 -----MAASVDPLVVGGRVIGDVLDMFIPPTAMMSVYF-GPKHITNGCE 41
          *: *****:*:*:*:*  *:. : * :.:***

GRMZM2G021614 LKPSATAAPPLVRISSRRNDLYTLIMTDPDAPSPSNPTMREYLHWIVINIPGGTDATKAH 102
Sb03g8270 LKPSATAAPPLVRISSRRNDLYTLIMTDPDAPSPSDPTMREYLHWIVTNIIPGGTDASK-- 99
GRMZM2G152689 LKPSATAAPPLVRISSRRDDLYTLIMTDPDAPSPSDPTMREYLHWIVTNIIPGGTDANK-- 99
GRMZM2G059358 LKPSATAAPPLVRISSRRDDLYTLIMTDPDAPSPSDPTMREYLHWIVTNIIPGGTDANK-- 99
Os01g02120 VRPSAADYPLVRISSRRNDLYTLIMTDPDAPSPSDPSMREFLHWIVVNIIPGGTDASK-- 99
HvMFT VKPSLAADQPLVRISSRRNDLYTLVMTDPDAPSPSEPTMREYLHWIVVNIIPGGTDATK-- 117
Qphs.pseru-3AS VKPSLAADQPLVRISSRRNDLYTLVMTDPDAPSPSEPTMREYLHWIVVNIIPGGTDATK-- 99
Bradi2g01020 IKPSMAAAQPLVRISSRRNDLYTLVMTDPDAPSPSDPTMREYLHWIVVNIIPGGTDATK-- 99
Os06g30370 IKPSVAAAPPAVQIAGRVNELFALVMTDPDAPSPSEPTMREWLHWLVVNIIPGGTDPSQ-- 99
At01g18100 IKPSTAVNPPKVNISGHSDELYTLVMTDPDAPSPSEPNMREWHVIVVDIPGGTNPSPR-- 99
:.*: * *.*:* :.:*:*****:*:*:*:* :*****:..

GRMZM2G021614 AKRRHRSALTRACVGAGEEVEYMGPRPPVGIHRYVVLVLFQKTRVHAEA---PGDRANF 159
Sb03g8270 -----GEEVVEYMGPRPPVGIHRYVVLVLFQKTRVHAEA---PRERANF 140
GRMZM2G152689 -----GEEVVEYMGPRPPVGIHRYVVLVLFQKTRVHAE---PGERANF 140
GRMZM2G059358 -----GEEVVEYMGPRPPVGIHRYVVLVLFQKTRVHAE---PGERANF 140
Os01g02120 -----GEMVEYMGPRPTVGIHRYVVLVLYEQKARFVDGALMPPADRPNF 143
HvMFT -----GEVVVYMGPRPPVGIHRYVVLVLFQKTRFPYVDAASPEDRAYF 161
Qphs.pseru-3AS -----GEVVVYMGPRPPVGIHRYVVLVLFQKTRFPYVPAASPDDRAYF 143
Bradi2g01020 -----GDTVVYMGPAAPVGIHRYVVLVLFQKTRAVDGMTAAPADRAYF 143
Os06g30370 -----GDVVVYMGPRPPVGIHRYVVMVLFQKARVAAPPPEDAARAF 143
At01g18100 -----GKEILPYMEPRPPVGIHRYILVLFQNSPVGLMVQ-QPPSRANF 142
          *. :. : ** * *.*****:*.:.*:. : * . *

GRMZM2G021614 KTRAFAAAHELGLPTAVVYFNAQKEPASRRR----- 190
Sb03g8270 NTRAFAAAHELGLPTAVVYFNAQKEPANRRR----- 171
GRMZM2G152689 NTRAFAAAHELGLPTAVVYFNAQKEPANHRRR----- 172
GRMZM2G059358 NTRAFAAAHELGLPTAVVYFNAQKEPANHRRR----- 172
Os01g02120 NTRAFAAHQGLPTAVVHFNSQREPANRRR----- 174
HvMFT NTRAFAGNHELGLPVAVVYFNSQKEPSGHRRRGMHAITLHAKQSDADLSRRIIAELPYIY 221
Qphs.pseru-3AS NTRAFAAHHELGLPVAVVYFNSQKEPSGHRRR----- 175
Bradi2g01020 STRAFAAHDLGLPVAVVYFNSQKEPAHNRRR----- 175
Os06g30370 STRAFADRHDLGLPVAALYFNAQKEPANRRRRY----- 176
At01g18100 STRMFAGHFDLGLPVATVYFNAQKEPASRRR----- 173
          .** ** .:****.*.:**:*:*:*: .**

GRMZM2G021614 -----
Sb03g8270 -----
GRMZM2G152689 -----
GRMZM2G059358 -----
Os01g02120 -----
HvMFT -----MHASNCYVLLITVSSHCAVCMHMRCMGTDFWGFAAQVCLPPRDGVFPGAPSCNNSR 281
Qphs.pseru-3AS -----
Bradi2g01020 -----
Os06g30370 -----
At01g18100 -----

```

**Figure S4** Sequence alignment of the deduced amino acids of *TaPHS1* homologs from maize (GRMZM2G021614, GRMZM2G152689, GRMZM2G059358), sorghum (Sb03g8270), *Brachypodium* (Bradi2g01020), barley (*HvMFT*), rice (Os01g02120, Os06g30370), *Arabidopsis* (At01g18100), and wheat (*Qphs.pseru-3AS*).

```

Rio Blanco -937 -----GACCCGAGGAGACGACAGCGACCCGAGGAGGCGGCTGGCCGTGGCTGGAGGA
NW97s186 -909 GCGACGAAGACCCGAGGAGGCGACGACGACCCGAGGAGGCGGCGGCCGTGGCAGGAGGA
          *****
-888 GACGGGCGAAGCACCGGCGGCCCGCTGCCACCGTCGCCCTCGTTCGATTTGGGAAGGGC
-849 GACGGGCGAAGCACCGGCGGCCCGCTGCCACCGTCGCCCTCGTTCGATTTGGGAAGGGC
          *****
-828 TCGCTCGGTAGGTGGTTAGGGTTCGCTCGGCTGGAGGAGAAGATATGCTTGGTTACTGG
-789 TCGCTCGGTAGGTGGTTAGGGTTCGCTCGGCTGGAGGAGAAGAGATGCTTGGTTACTGG
          *****
-768 GCCAGAAAGCCCAAAGTATAGTGGGCTGATGAAAAATTCGTC TGGAAAAAACACTGTC
-729 GCCAGAAAGCCCAAATAATAATGGGCTGATGAAAAATTCGTC TGGAAAAAACGCCATC
          *****
-708 GAAAAATAGCATCGATACGCGCTGTAGCGTGCAATCGCCGATTTAGCGCAATAGCGC
-669 GAAAAATAGCACCGATACGCGCTGTAGAGCGCAATCGCCGATTTAGCGTGAATAGCGC
          *****
-648 CGTAGCGGTTGAAATCTGCATATCGTAGCGT TTAGTTTCCAGAAACGCTATAGCGCGTA
-609 CATAGCGAGTGAAATCTGCATAGTGTAGCGT TTAGTTTCCAGAAACGCTATAGC-----
          *****
-588 TTAGCGCCGCTATAGTGTCTATTTT TTTCTTTGATT CATAGAGATGAGCATAATGTGCGT
-555 -----CGCTATAGCGCGCTATTTT TTTCTTTTCCATCCATAGAGATGAGCATAATGTGTT
          *****
-528 ATCTATGAGCGCTTT-TTATGTACTGTGTGAGAAAGAAAAAACCCAGACTAAGGAAGTGC
-502 ATCTATGAGCGCTCTCTTATGTACTGTGTGAGAAAGAAAAAACCCAGACTAAGGAAGTGC
          *****
-469 ATGCATCTGGCTCGGCGAGTGATGTAAACAAC TGGCTCACATGTCATGCGTACATC
-442 ATGCATCTGGCTCGGCGAGTGATGTAAACAAC TGGCTCACATGTCATGCGTACATC
          *****
-409 CATGCGCAGTACACACGCGAG-----CTGGTGGATCCAGCCAGCGGATTGTCCTGTCTCGC
-382 CATGCGCAGTACACACGCGAGCGAGCTGGTGGATCCAGCCAGCGGATTGTCCTGTCTCGC
          *****
                                     -314
-355 TGGCGGGAGAGGCACGCAGTACGCACCCAGATCATCACCCCATACGTCGCGCCGGTCC
-322 TGGCGGGAGAGGCACGCAGTACGCACCCAGATCATCACCCCATACGTCGCGCCGGTCC
          *****
-295 TTCCAGAGGCCATGTGCCGGCTACGTGTGCTTGACCTGTACATGTCATGATCCATGCACG
-262 TTCCAGAGGCCATGTGCCGGCTACGTGTGCTTGACCTGTACATGTCATGATCCATGCACG
          *****
                                     -222
-235 CATCAGCGATCGACACGATGCGTAGGCTGCATGCACGCATGGCGCCAAGGAGGGTAGCC
-202 CATCAGCGATCGATACGATGCGTAGGCTGCATGCACGCATGG-----
          *****
-175 CAAGTCCCAACCCCGTGACAAAACCCTCAGTTAATAATCCGCCGCGCTAGCCACCTGCT
-161 -----TGACAAAACCCTCAGTTAATAATCCGCCGCGCTAGCCACCTGCT
          *****
-115 TAGCGTAAGCCATATATACACCAGCCATGCGTCATTGTACAGGTCGTCGTTGGCTCTC
-115 TAGCGTAAGCCATATATACACCAGCCATGCGTCATTGTACAGGTCGTCGTTGGCTCTC
          *****
                                     +1
-55 GTCCAGAGAAAAGCAGGGGAAGACAAGGAGAAAAGAGCAGAGCAGAGGAGCAAAACATGTC
-55 GTCCAGAGAAAAGCAGGGGAAGACAAGGAGAAAAGAGCAGAGCAGAGGAGCAAAACATGTC
          *****
+6 CCGGTTTCGTTGATCCGCTGGTGGTGGGGCGGGTGATCGGCGAGGTGGTGGACATGTTTCGT
+6 CCGGTTTCGTTGATCCGCTGGTGGTGGGGCGGGTGATCGGCGAGGTGGTGGACATGTTTCGT
          *****

```

**Figure S5** Comparison of the promoter sequences between Rio Blanco and NW97S186. Identical sequences are labeled by \*. ABRE CEs are indicated by blue or yellow boxes if two ABRE CEs overlapped. RY repeats are indicated by green letters. Motif IIB is underlined. Two SNPs in the ABRE CEs at -222 and -314 positions are shown in red letters.

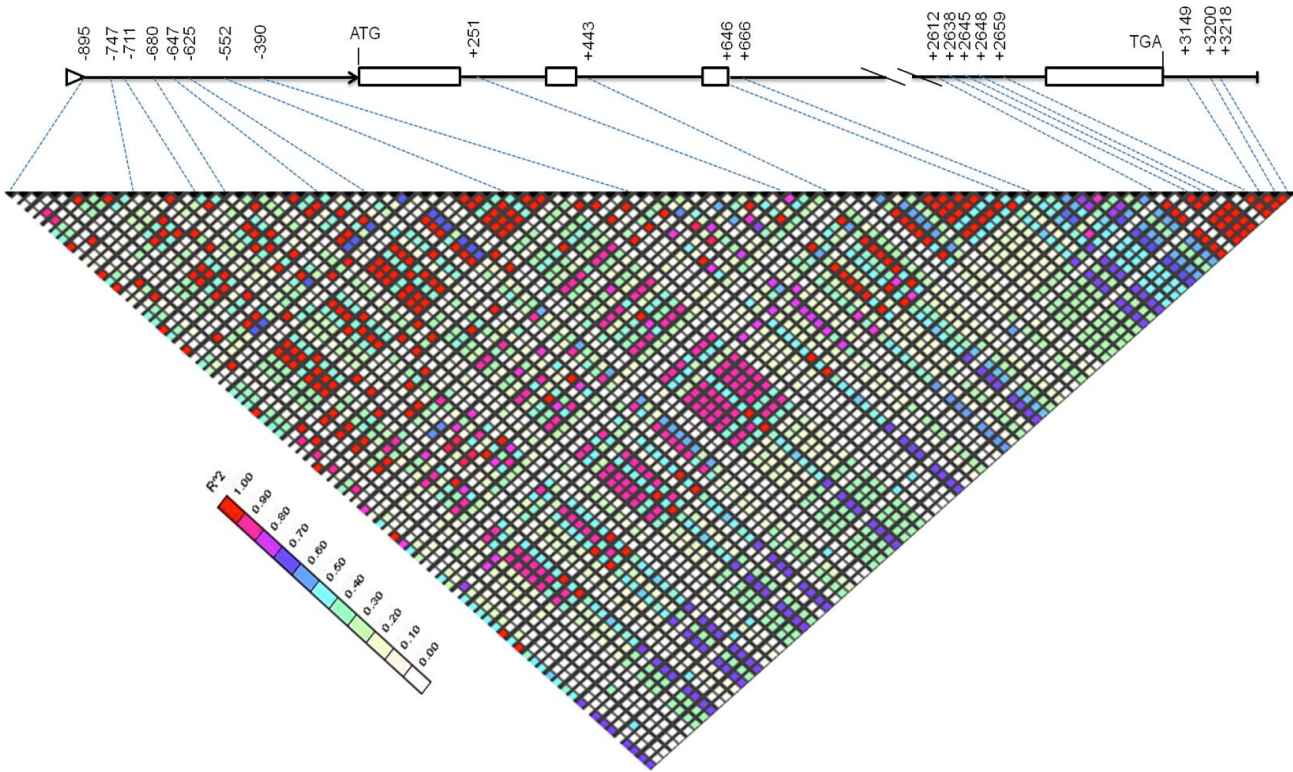

**Figure S6** Linkage disequilibrium (LD) between the two causal SNPs (+646 and +666) in intron 3 and 18 polymorphic sites of *TaPHS1* analyzed in 82 wheat cultivars. The upper part is the gene structure of *TaPHS1*, and the lower part is the LD graph. From left to right, each grid indicates one SNP or InDel of the 84 SNPs or InDels in the order from the 5'-end of *TaPHS1* promoter. Among the 84 sequence variations, only 20 variations that were significantly associated with PHS resistance were labeled on the graph, including two causal SNPs (+646 and +666) in intron 3 and the 18 non-causal polymorphic sites (Figure 5A) associated with sprouting resistance due to their LD to the two causal SNPs.

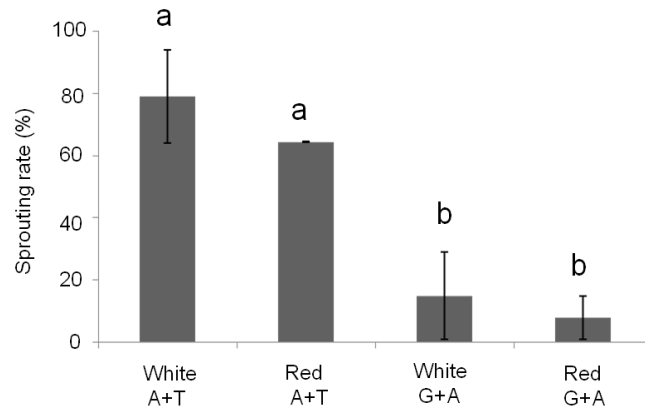

**Figure S7** Two causal SNPs determine PHS resistance. White wheat had slightly higher spike sprouting rates than red wheat in both haplotypes of *TaPHS1* based on the two causal SNPs loci (+646 and +666), but the difference was not significant (a and b indicate significant difference at  $P < 0.05$ ) as the two causal SNPs ( $P=2.98 \times 10^{-5}$ , Figure 5B).

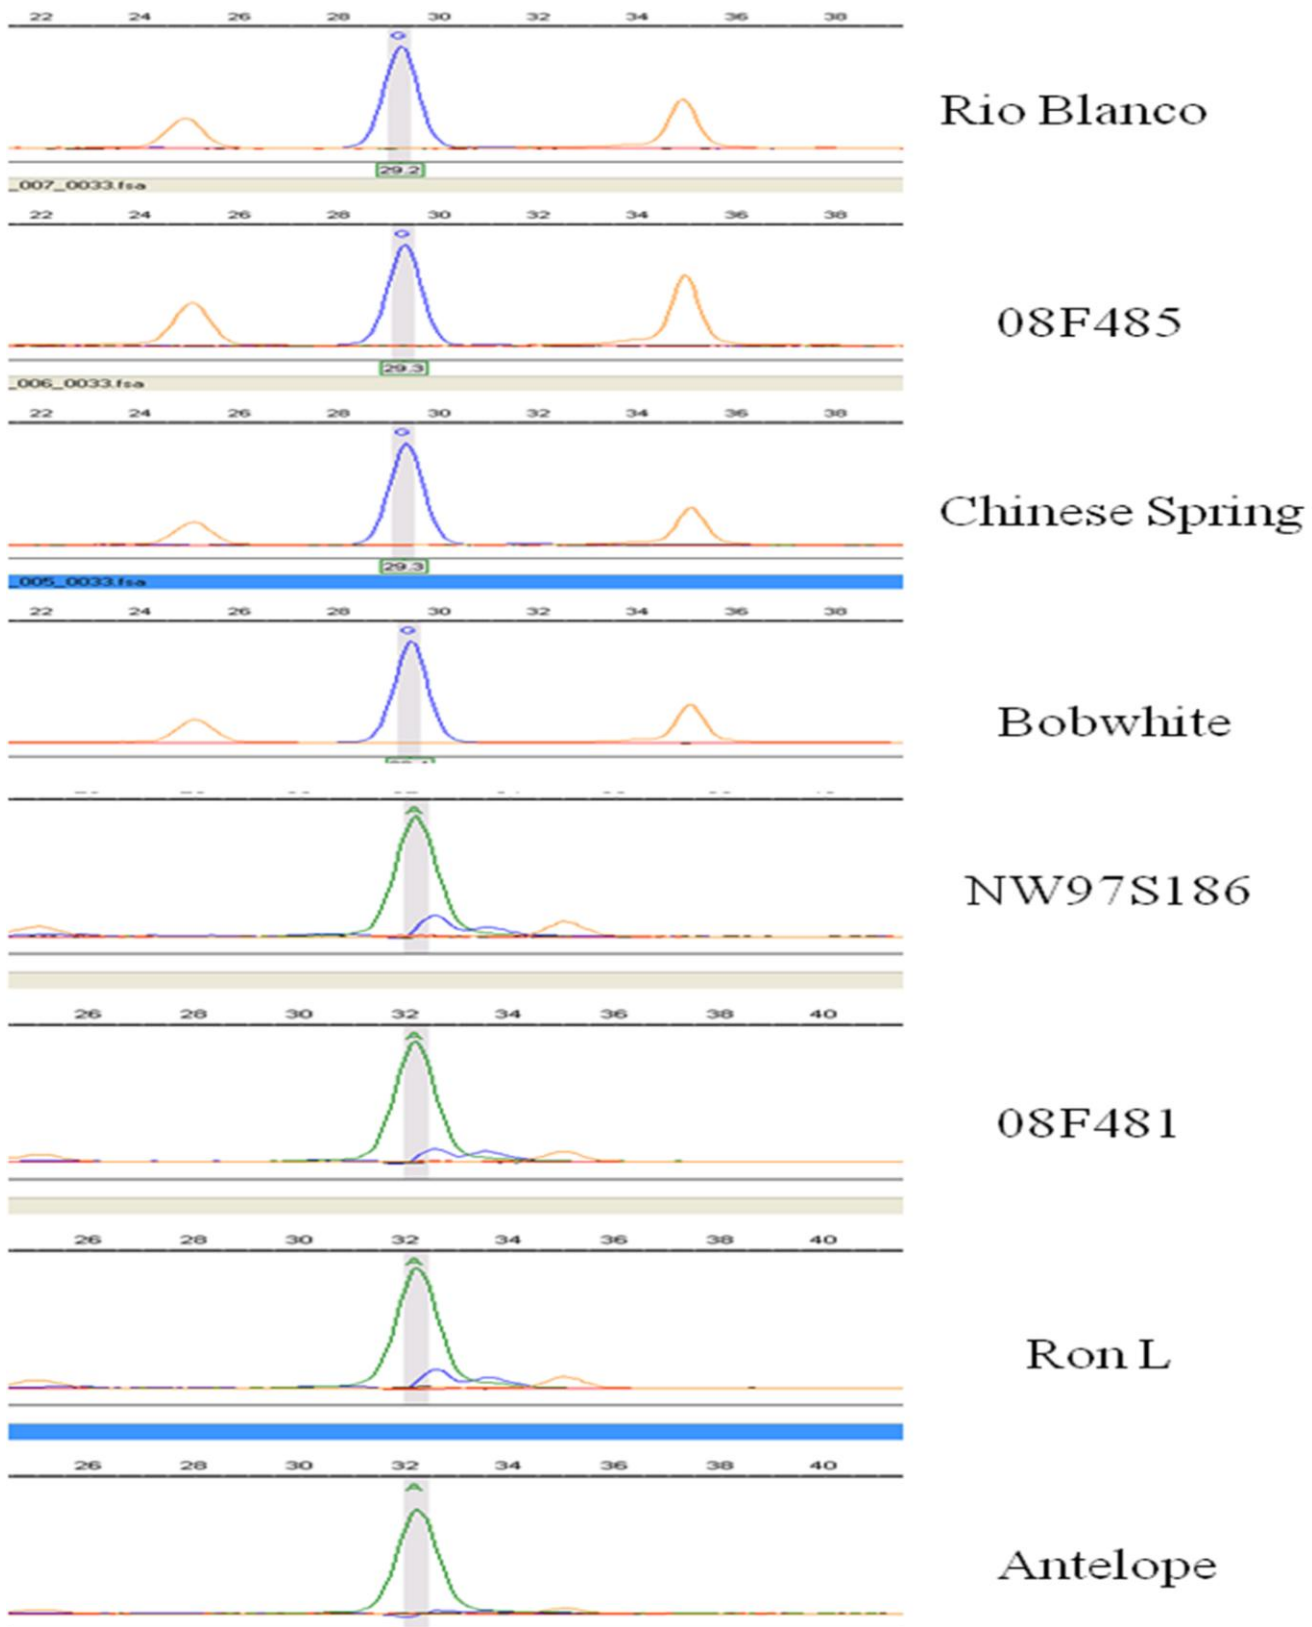

**Figure S8** One diagnostic SNP markers for *TaPHS1* (*TaPHS1-SNP1*) was developed based on the GT-to-AT mutation at the mis-splicing site (+646) in susceptible cultivars. The SNP was analyzed using SNPShot via an ABI3730 DNA analyzer. The top four cultivars with blue (G) peaks are sprouting resistant, and the bottom four cultivars with green (A) peaks are sprouting susceptible.



**Table S1 Primers used for sequencing, gene expression, and gene transformation**

|                              | Forward                        | Reverse                          | SNP primer           |
|------------------------------|--------------------------------|----------------------------------|----------------------|
| <i>Ta PHS1</i> -GS           | GCGACGAAGACCCGAGGAGG           | GCACGACTGAATGAAAATCT             | -                    |
| <i>TaPHS1</i> - P            | CCTGCTTTTCTCTGGACGAG           | CATCGAGTTGTGGAGCAAGA             | -                    |
| <i>TaPHS1</i> -17F18         | TTCAGCACCGTGATAAGAGG           | GGCGCTCAATTTTCATGTTGT            | -                    |
| <i>TaPHS1</i> -18F18         | CAAGATATCGCAAATCGAAAGA         | ACGACAGTGCTCCAA                  | -                    |
| <i>TaPHS1</i> -19F18         | TGCATGCTCGAAAGTTTGTG           | CACCTAAGACCCAAC                  | -                    |
| <i>TaPHS1</i> -20F18         | ACATGGGGTGACATGAGCTA           | TCACTGCGTGCGTTTTA                | -                    |
| <i>TaPHS1</i> -21F18         | TACCGTGAGAGACACGCAAG           | CCGTGACAAAACCT                   | -                    |
| <i>TaPHS1</i> -SNP1 (+646)   | GTGAGAGACACGCAAGAACG           | TTTGTACAGGTCGTCGTTGG             | TGGAACAGATGCAACTAAAG |
| <i>TaPHS1</i> -SNP2 (+666)   | GTGAGAGACACGCAAGAACG           | TTTGTACAGGTCGTCGTTGG             | GTTAGTACTTTATTTATGAC |
| <i>TaPHS1</i> -CDS           | (P1) ATGTCCCGGTTTCGTTGATCCGCTG | (P6)TCAACGCCGGCGGTGTCCGGAC       | -                    |
| <i>ACTIN</i>                 | ACCTTCAGTTGCCAGCAAT            | CAGAGTCGAGCACAATACCAGTTG         | -                    |
| AK330655 full length cDNA    | TGTCCCGGTTTCGTTGATCCGCTG       | TTTGAGCGCAACTGCATGCTA            | -                    |
| <i>TaPHS1</i> P1 and P2      | The same as P1                 | (P2) TCTGTTCCACCCGGTATGTT        | -                    |
| <i>Taphs1</i> - CDS (P3, P4) | (P3)GAGGTGGTGGACATGTTCTG       | (P4)TGATCTTTAGTTGCATCTGTTCC      | -                    |
| PHS1 P5 and P6               | (P5)TGTCCCGGTTCGTTGAT          | (P6)CTAGGGCTAGGCGCGTCA           | -                    |
| for RNAi and over-expression |                                |                                  |                      |
| RNAi                         | RNAi-F TGCTCACCGACCAACAATAG    | RNAi-R: TTTTTGAGCGCCAAGTGC       | -                    |
|                              | Gus-F1: CACGTAGTCCGCATCTTCA    | Gus-R2: GTGGAGTGAAGAGTATCAGTGTGC | -                    |
| Bar                          | CCTGCCTTCATACGCTATTTATTTGC     | CTTCAGCAGGTGGGTGTAGAGCGT G       | -                    |

**Table S2** Genotypic data and sprouting resistance levels of the 56 recombinants analyzed with the markers in the QTL *Qphs.pseru-3AS* region

| No. of RSLs | Xbarc12 | XFE900150 | Xctg830728 | XBE424484 | XBE401794 | XCD910417 | XCA654295 | XAL815375 | Xctg30698 | XCJ575364 | XCJ550920 | XCJ551268 | XCJ952112 | XBE591959 | Xbarc57 | Xbarc321 | PHS rate |
|-------------|---------|-----------|------------|-----------|-----------|-----------|-----------|-----------|-----------|-----------|-----------|-----------|-----------|-----------|---------|----------|----------|
| 08F485      | A       | A         | A          | A         | A         | A         | A         | A         | A         | A         | A         | A         | A         | A         | A       | A        | L        |
| 1           | A       | A         | A          | A         | A         | A         | A         | A         | A         | A         | A         | A         | A         | A         | A       | B        | L        |
| 16          | B       | A         | A          | A         | A         | A         | A         | A         | A         | A         | A         | A         | A         | A         | A       | A        | L        |
| 1           | B       | A         | A          | A         | A         | A         | A         | A         | A         | A         | A         | A         | A         | A         | A       | B        | L        |
| 1           | B       | A         | A          | A         | A         | A         | A         | B         | B         | B         | B         | B         | B         | B         | B       | B        | L        |
| 1           | A       | A         | A          | A         | B         | B         | B         | B         | B         | B         | B         | B         | B         | B         | B       | B        | H        |
| 2           | A       | A         | B          | B         | B         | B         | B         | B         | B         | B         | B         | B         | B         | B         | B       | B        | H        |
| 3           | A       | B         | B          | B         | B         | B         | B         | B         | B         | B         | B         | B         | B         | B         | B       | A        | H        |
| 31          | A       | B         | B          | B         | B         | B         | B         | B         | B         | B         | B         | B         | B         | B         | B       | B        | H        |
| 08F481      | B       | B         | B          | B         | B         | B         | B         | B         | B         | B         | B         | B         | B         | B         | B       | B        | H        |

A=Rio Blanco genotype; B=NW97S186 genotype. L=low PHS rates as in NW97S186; H=high PHS rates as in Rio Blanco.

Those red letters are the markers co-segregated with *TaPHS1*.

**Table S3** Thirteen genes that were mapped in the QTL *Qphs.pseru-3AS* region by comparative mapping

| Wheat ESTs | Rice annotated genes  | <i>Branchypodium</i> annotated gene | Forward primer        | Reverse primer           | SNP primer*                |
|------------|-----------------------|-------------------------------------|-----------------------|--------------------------|----------------------------|
| XFE900150  | <i>LOC_Os01g15209</i> | <i>Bradi2g00780</i>                 | TTTTGTGCCCTCGTATGTTT  | AGCTGAACAATGGCGAAGAT     | -                          |
| Ctg830728  | <i>LOC_Os01g02050</i> | <i>Bradi 2g00910</i>                | CAACCTAGGCGGCAGTTTTA  | ACCGAGACgGGAATCCTAAT     | -                          |
| BE423484   | <i>LOC_Os01g02070</i> | no                                  | CCACGGTCTCGTCATTCTT   | TTTCGAAACGGAACTAGCC      | -                          |
| BE401794   | <i>LOC_Os01g02090</i> | <i>Bradi 2g00980</i>                | GGGCCATCTTGGTAGGAAAT  | TGCTCACCAGGCATGAGATA     | -                          |
| CD910417   | <i>LOC_Os01g02100</i> | <i>Bradi 2g00990</i>                | CATGCCTGTGAAGAGCTCAG  | AAGGTACGGGTGCAATGAAT     | AGCACTGGACTGAAGTT<br>TACCA |
| CA654295   | <i>LOC_Os01g02110</i> | <i>Bradi 2g01000</i>                | GTCCGAAGAGAGCGCATCA   | GGAGAATTGATCTAAAAGGAGTGA | -                          |
| AL815375   | <i>LOC_Os01g02130</i> | <i>Bradi 2g01030</i>                | CCCTCTCGCTGCTAACCAC   | GTACGTACACGCGCACCA       | -                          |
| Ctg30698   | no                    | <i>Bradi 2g01070</i>                | GTATTGCCAGCCCCTGACT   | GAACCCTGAGGGATGTCAAA     | -                          |
| CJ575364   | <i>LOC_Os01g02170</i> | <i>Bradi 2g01090</i>                | TCACTGCAACCAAAATTCTCA | GGTGTGCCTGCACTACCTCT     | -                          |
| CJ550920   | <i>LOC_Os01g02190</i> | <i>Bradi 2g01090</i>                | CGGCTAGCTGGCTAGTTCGT  | AAGGGCAGGACCTAGAGC       | -                          |
| CJ551268   | <i>LOC_Os01g02200</i> | <i>Bradi 2g01100</i>                | CGCTTATGATGGGCTTATTTG | ATCCTTGGGATTGCATCATC     | -                          |
| CJ952112   | <i>LOC_Os01g02300</i> | <i>Bradi 2g01120</i>                | ATCGGAAGCATTACCATGT   | GCCAGCTCAAGCATGTCTA      | -                          |
| BE591959   | <i>LOC_Os01g02310</i> | no                                  | TTTCAGGGTCAATTTGGTGA  | TTGCATAGTCCAAAATCAGAAA   | -                          |

\* indicates the gene that was mapped using the SNP marker.

**Table S4 Genes identified by sequencing the three BACs spanning the *Qphs.pseru-3AS* region**

| <i>Brachypodium</i> homologs | Rice homologs  | Predicted gene function                       |
|------------------------------|----------------|-----------------------------------------------|
| Bradi2g00950                 | LOC_Os01g02080 | Peptidyl-prolyl cis-trans isomerase           |
| Bradi2g00980                 | LOC_Os01g02090 | Uncharacterized mRNA-associated protein RAP55 |
| Bradi2g00990                 | LOC_Os01g02100 | Tm3 transposase                               |
| Bradi2g01000                 | LOC_Os01g02110 | HLH DNA-binding domain containing protein     |
| Bradi2g01010                 | no             | Cell division cycle                           |
| Bradi2g01020                 | LOC_Os01g02120 | Homologous to Mother of FT and TFL1 gene      |

**Table S5 Relationship among two structure groups, seed color, and causal SNPs for PHS resistance in *TaPHS1*.**

| Cultivars      | Seed color | Structure group | SNP at +646 | SNP at +666 |
|----------------|------------|-----------------|-------------|-------------|
| Trego          | white      | 1               | G           | A           |
| SD07W041       | white      | 1               | G           | A           |
| NW05M6015-25-4 | white      | 1               | G           | A           |
| KS07HW25       | white      | 1               | G           | A           |
| KS07HW81       | white      | 1               | G           | A           |
| Snowmass       | white      | 1               | G           | A           |
| OK Rising      | white      | 1               | G           | A           |
| Rio Blanco     | white      | 1               | G           | A           |
| Danby          | white      | 1               | G           | A           |
| Avalanche      | white      | 1               | G           | A           |
| CO05W101       | white      | 1               | G           | A           |
| Mesa           | white      | 1               | G           | A           |
| KS07HW52-5     | white      | 1               | G           | A           |
| NE08452        | red        | 1               | G           | A           |
| Jagger         | red        | 1               | G           | A           |
| Overland       | red        | 1               | G           | A           |
| Intrada        | white      | 1               | G           | A           |
| KS05HW136-3    | white      | 1               | G           | A           |
| CO02W237       | white      | 1               | G           | A           |
| CO03W139       | white      | 1               | G           | A           |
| KS05HW121-2    | white      | 1               | G           | A           |
| CO03W043       | white      | 1               | G           | A           |
| SD05W030       | white      | 1               | G           | A           |
| SD05W148-1     | white      | 1               | G           | A           |
| Tiger          | white      | 1               | G           | A           |
| Lakin          | white      | 1               | G           | A           |
| Hartog         | white      | 1               | G           | A           |
| KS010990M-8    | white      | 1               | G           | A           |
| Infinity CL    | red        | 1               | G           | A           |
| Thunder CL     | white      | 1               | G           | A           |
| Recital        | white      | 1               | G           | A           |
| NW03Y2016      | white      | 1               | G           | A           |
| OK Bullet      | red        | 1               | G           | A           |
| Postrock       | red        | 1               | G           | A           |
| Santa Fe       | red        | 1               | G           | A           |
| NX03Y2489      | white      | 1               | A           | T           |
| NX04Y2107      | white      | 1               | A           | T           |
| Antelope       | white      | 1               | A           | T           |
| KS05HW15-2     | white      | 1               | A           | T           |
| CO04W210       | white      | 1               | A           | T           |
| KS07HW117      | white      | 1               | A           | T           |
| RonL           | white      | 1               | A           | T           |
| NW97S078       | white      | 1               | A           | T           |

---

|                |       |   |   |   |
|----------------|-------|---|---|---|
| Grandin        | red   | 1 | A | T |
| CO03W054       | white | 2 | G | A |
| NW04Y2188      | white | 2 | G | A |
| Janz           | white | 2 | G | A |
| Spica          | white | 2 | G | A |
| Overlay        | red   | 2 | G | A |
| Jackpot        | red   | 2 | G | A |
| Jagalene       | red   | 2 | G | A |
| AC Taber       | red   | 2 | G | A |
| ZenkojiKomugi  | red   | 2 | G | A |
| Bobwhite       | red   | 2 | G | A |
| Karl92         | red   | 2 | G | A |
| Chinese Spring | red   | 2 | G | A |
| Aus1408        | white | 2 | G | A |
| Bungulla       | white | 2 | G | A |
| NW96S016       | white | 2 | G | A |
| TutoumaiA      | white | 2 | G | A |
| Betty          | white | 2 | G | A |
| Champlain      | white | 2 | G | A |
| Halberd        | white | 2 | G | A |
| Jabim          | white | 2 | G | A |
| Kite           | white | 2 | G | A |
| Lerma Rojo     | white | 2 | G | A |
| Siyang936      | white | 2 | G | A |
| 2137           | red   | 2 | G | A |
| Bill Brown     | red   | 2 | G | A |
| Hatcher        | red   | 2 | G | A |
| Losprout       | red   | 2 | G | A |
| Heyne          | white | 2 | G | A |
| 99ID536        | white | 2 | G | A |
| Protection CL  | red   | 2 | G | A |
| Renan          | red   | 2 | G | A |
| Jing411        | white | 2 | A | T |
| NW05M6011-6-1  | white | 2 | A | T |
| NW97S186       | white | 2 | A | T |
| John           | white | 2 | A | T |
| Klasic         | white | 2 | A | T |
| Geneva         | white | 2 | A | T |
| Xinchun9       | white | 2 | A | T |

---
