# Supplementary material
Source: PubMed Central journal article supplement (PMC3761307)
Supplement: 8def8b19e9781e96c9887204a451d195_genetics.113.152330-1.pdf [file 8def8b19e9781e96c9887204a451d195_genetics.113.152330-1.pdf]

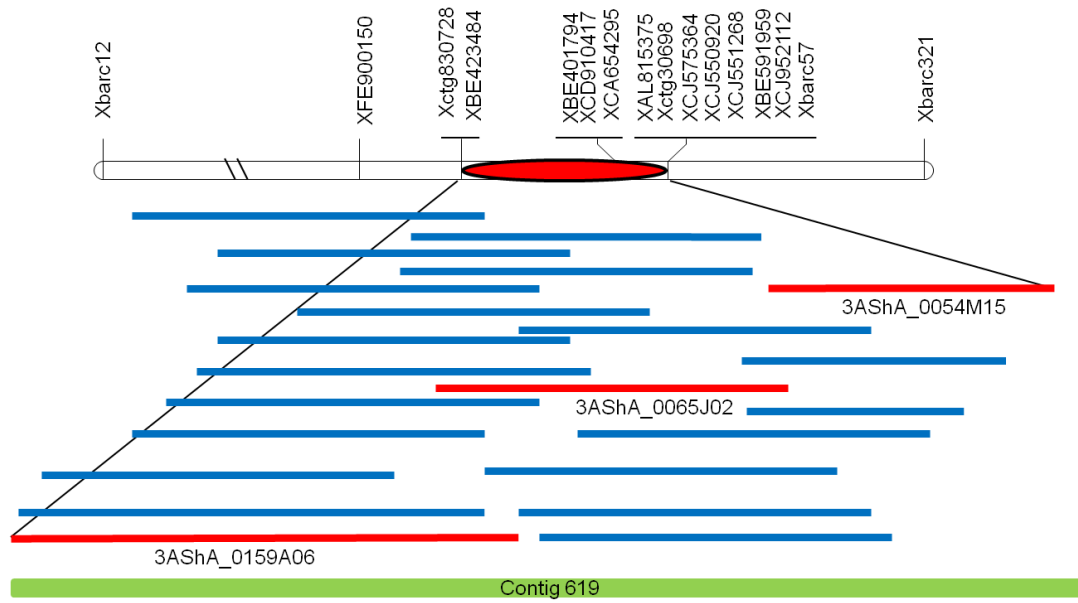

**Figure S3** BAC contig Ctg619 (bottom solid bar) spans the entire *Qphs.pseru-3AS* region. Top bar is the linkage map of *Qphs.pseru-3AS* with the *Qphs.pseru-3AS* region labeled by red oval. Solid bars between the linkage map and the contig bar are different BACs in the contig. Three BACs with red color that cover the entire QTL region were selected for sequencing to identify candidate genes for *TaPHS1*.
