# Supplementary material
Source: PubMed Central journal article supplement (PMC3761307)
Supplement: 041d1f5300118a69338b56a20e24df28_genetics.113.152330-13.pdf [file 041d1f5300118a69338b56a20e24df28_genetics.113.152330-13.pdf]

```

Rio Blanco -937 -----GACCCGAGGAGACGACAGCGACCCGAGGAGGCGGCTGGCCGTGGCTGGAGGA
NW97s186 -909 GCGACGAAGACCCGAGGAGGCGACGACGACCCGAGGAGGCGGCGGCCGTGGCAGGAGGA
          *****
-888 GACGGGCGAAGCACC GGCGCCCGCGCTGCCACCGTCGCCTCGTTCGATTTGGGAAGGGC
-849 GACGGGCGAAGCACC GGCGCCCGCGCTGCCACCGTCGCCTCGTTCGATTTGGGAAGGGC
          *****
-828 TCGCTCGGTAGGTGGTTAGGGTTCGCTCGGCTGGAGGAGAAGATATGCTTGGTTACTGG
-789 TCGCTCGGTAGGTGGTTAGGGTTCGCTCGGCTGGAGGAGAAGAGATGCTTGGTTACTGG
          *****
-768 GCCAGAAAGCCCAAAGTATAGTGGGCTGATGAAAAATTCGTC TGGAAAAAACACTGTC
-729 GCCAGAAAGCCCAAATAATAATGGGCTGATGAAAAATTCGTC TGGAAAAAACGCCATC
          *****
-708 GAAAAATAGCATCGATACGCGCTGTAGCGTGCAATCGCCGATTTAGCGCAATAGCGC
-669 GAAAAATAGCACCGATACGCGCTGTAGAGCGCAATCGCCGATTTAGCGTGAATAGCGC
          *****
-648 CGTAGCGGTTGAAATCTGCATATCGTAGCGT TTAGTTTCCAGAAACGCTATAGCGCGTA
-609 CATAGCGAGTGAAATCTGCATAGTGTAGCGT TTAGTTTCCAGAAACGCTATAGC-----
          *****
-588 TTAGCGCCGCTATAGTGTCTATTTT TTTCTTTGATT CATAGAGATGAGCATAATGTGCGT
-555 -----CGCTATAGCGCGCTATTTT TTTCTTTTCCATCCATAGAGATGAGCATAATGTGTT
          *****
-528 ATCTATGAGCGCTTT-TTATGTACTGTGTGAGAAAGAAAAAACCCAGACTAAGGAAGTGC
-502 ATCTATGAGCGCTCTCTTATGTACTGTGTGAGAAAGAAAAAACCCAGACTAAGGAAGTGC
          *****
-469 ATGCATCTGGCTCGGCGAGTGATGTAAACAAC TGGCTCACATGTCATGCGTACATC
-442 ATGCATCTGGCTCGGCGAGTGATGTAAACAAC TGGCTCACATGTCATGCGTACATC
          *****
-409 CATGCGCAGTACACACGCGAG-----CTGGTGGATCCAGCCAGCGGATTGTCTGTCTCGC
-382 CATGCGCAGTACACACGCGAGCGAGCTGGTGGATCCAGCCAGCGGATTGTCTGTCTCGC
          *****
                                     -314
-355 TGGCGGGAGAGGCACGCAGTACGCACCCAGATCATCACCCCATACGTGGCACGCCGGTCC
-322 TGGCGGGAGAGGCACGCAGTACGCACCCAGATCATCACCCCATACGTGGCACGCCGGTCC
          *****
-295 TTCCAGAGGCCATGTGCCGGCTACGTGTGCGTTGACCTGTACATGCATGATCCATGCACG
-262 TTCCAGAGGCCATGTGCCGGCTACGTGTGCGTTGACCTGTACATGCATGATCCATGCACG
          *****
                                     -222
-235 CATCAGCGATCGACACGTATGCGTAGGCTGCATGCACGCATGGCGCCAAGGAGGGTAGCC
-202 CATCAGCGATCGATACGTATGCGTAGGCTGCATGCACGCATGG-----
          *****
-175 CAAGTCCCAACCCCGTGACAAAACCCTCAGTTAATAATCCGCCGCGCTAGCCACCTGCT
-161 -----TGACAAAACCCTCAGTTAATAATCCGCCGCGCTAGCCACCTGCT
          *****
-115 TAGCGTAAGCCATATATACACCAGCCATGCGTCATTGTACAGGTCGTCGTTGGCTCTC
-115 TAGCGTAAGCCATATATACACCAGCCATGCGTCATTGTACAGGTCGTCGTTGGCTCTC
          *****
                                     +1
-55 GTCCAGAGAAAAGCAGGGGAAGACAAGGAGAAAAGAGCAGAGCAGAGGAGCAAACATGTC
-55 GTCCAGAGAAAAGCAGGGGAAGACAAGGAGAAAAGAGCAGAGCAGAGGAGCAAACATGTC
          *****
+6 CCGGTTTCGTTGATCCGCTGGTGGTGGGGCGGGTGATCGGCGAGGTGGTGGACATGTTTCGT
+6 CCGGTTTCGTTGATCCGCTGGTGGTGGGGCGGGTGATCGGCGAGGTGGTGGACATGTTTCGT
          *****

```

**Figure S5** Comparison of the promoter sequences between Rio Blanco and NW97S186. Identical sequences are labeled by \*. ABRE CEs are indicated by blue or yellow boxes if two ABRE CEs overlapped. RY repeats are indicated by green letters. Motif IIB is underlined. Two SNPs in the ABRE CEs at -222 and -314 positions are shown in red letters.
