# Supplementary material
Source: PubMed Central journal article supplement (PMC3761307)
Supplement: 44ae838b2a49f796a628cc5c8532b509_genetics.113.152330-2.pdf [file 44ae838b2a49f796a628cc5c8532b509_genetics.113.152330-2.pdf]

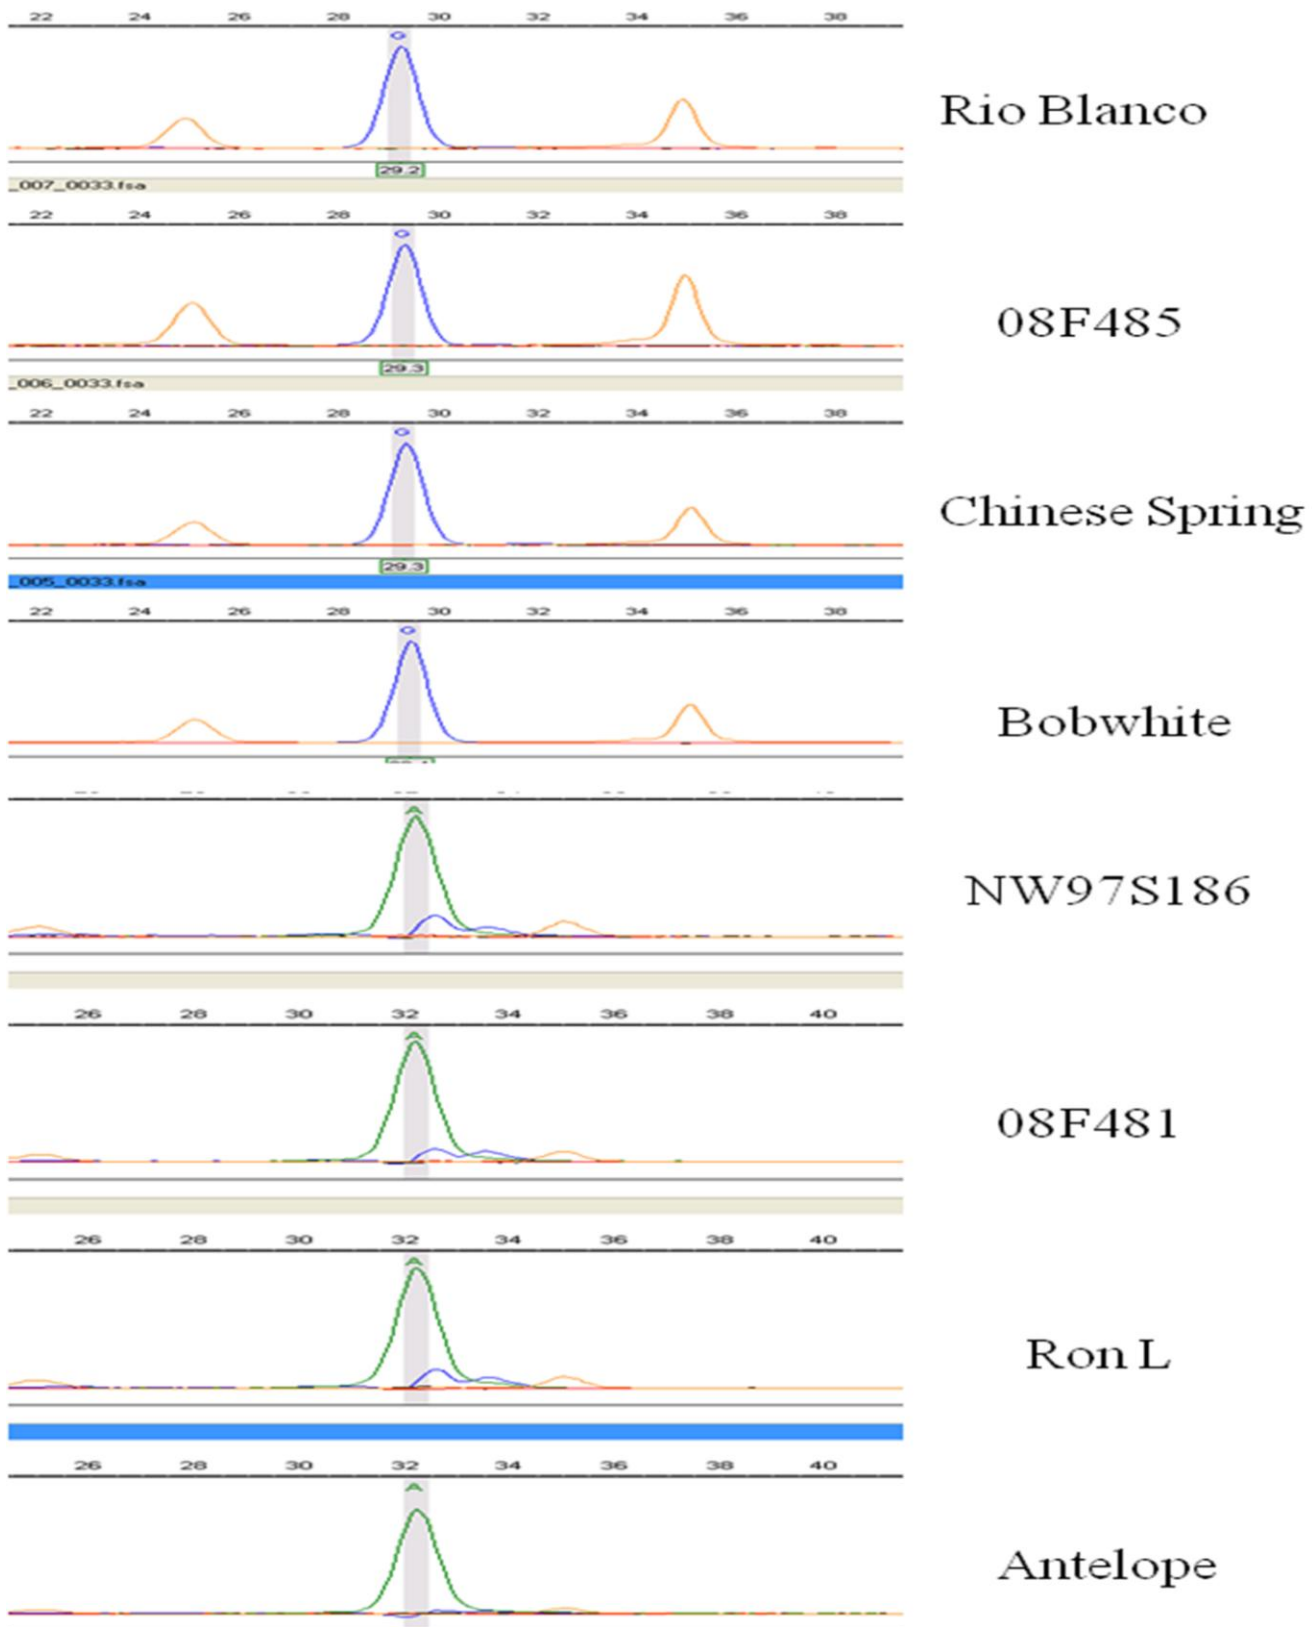

**Figure S8** One diagnostic SNP markers for *TaPHS1* (*TaPHS1-SNP1*) was developed based on the GT-to-AT mutation at the mis-splicing site (+646) in susceptible cultivars. The SNP was analyzed using SNPShot via an ABI3730 DNA analyzer. The top four cultivars with blue (G) peaks are sprouting resistant, and the bottom four cultivars with green (A) peaks are sprouting susceptible.
