# Supplementary material
Source: PubMed Central journal article supplement (PMC3761307)
Supplement: 984ef01fb1258b8cff349f7a9818acfa_genetics.113.152330-10.pdf [file 984ef01fb1258b8cff349f7a9818acfa_genetics.113.152330-10.pdf]

**Table S1 Primers used for sequencing, gene expression, and gene transformation**

|                              | Forward                        | Reverse                          | SNP primer           |
|------------------------------|--------------------------------|----------------------------------|----------------------|
| <i>Ta PHS1</i> -GS           | GCGACGAAGACCCGAGGAGG           | GCACGACTGAATGAAAATCT             | -                    |
| <i>TaPHS1</i> - P            | CCTGCTTTTCTCTGGACGAG           | CATCGAGTTGTGGAGCAAGA             | -                    |
| <i>TaPHS1</i> -17F18         | TTCAGCACCGTGATAAGAGG           | GGCGCTCAATTTTCATGTTGT            | -                    |
| <i>TaPHS1</i> -18F18         | CAAGATATCGCAAATCGAAAGA         | ACGACAGTGCTCCAA                  | -                    |
| <i>TaPHS1</i> -19F18         | TGCATGCTCGAAAGTTTGTG           | CACCTAAGACCCAAC                  | -                    |
| <i>TaPHS1</i> -20F18         | ACATGGGGTGACATGAGCTA           | TCACTGCGTGCGTTTTA                | -                    |
| <i>TaPHS1</i> -21F18         | TACCGTGAGAGACACGCAAG           | CCGTGACAAAACCT                   | -                    |
| <i>TaPHS1</i> -SNP1 (+646)   | GTGAGAGACACGCAAGAACG           | TTTGTACAGGTCGTCGTTGG             | TGGAACAGATGCAACTAAAG |
| <i>TaPHS1</i> -SNP2 (+666)   | GTGAGAGACACGCAAGAACG           | TTTGTACAGGTCGTCGTTGG             | GTTAGTACTTTATTTATGAC |
| <i>TaPHS1</i> -CDS           | (P1) ATGTCCCGGTTTCGTTGATCCGCTG | (P6)TCAACGCCGGCGGTGTCCGGAC       | -                    |
| <i>ACTIN</i>                 | ACCTTCAGTTGCCAGCAAT            | CAGAGTCGAGCACAATACCAGTTG         | -                    |
| AK330655 full length cDNA    | TGTCCCGGTTTCGTTGATCCGCTG       | TTTGAGCGCCAACGTCATGCTA           | -                    |
| <i>TaPHS1</i> P1 and P2      | The same as P1                 | (P2) TCTGTTCCACCCGGTATGTT        | -                    |
| <i>Taphs1</i> - CDS (P3, P4) | (P3)GAGGTGGTGGACATGTTCTG       | (P4)TGATCTTTAGTTGCATCTGTTCC      | -                    |
| PHS1 P5 and P6               | (P5)TGTCCCGGTTCGTTGAT          | (P6)CTAGGGCTAGGCGCGTCA           | -                    |
| for RNAi and over-expression |                                |                                  |                      |
| RNAi                         | RNAi-F TGCTCACCGACCAACAATAG    | RNAi-R: TTTTTGAGCGCCAACGTC       | -                    |
|                              | Gus-F1: CACGTAGTCCGCATCTTCA    | Gus-R2: GTGGAGTGAAGAGTATCAGTGTGC | -                    |
| Bar                          | CCTGCCTTCATACGCTATTTATTTGC     | CTTCAGCAGGTGGGTGTAGAGCGT G       | -                    |
