# Supplementary material
Source: PubMed Central journal article supplement (PMC3761307)
Supplement: 2753b3fc6cb3cb560533fbf8875e1601_genetics.113.152330-3.pdf [file 2753b3fc6cb3cb560533fbf8875e1601_genetics.113.152330-3.pdf]

**Table S2** Genotypic data and sprouting resistance levels of the 56 recombinants analyzed with the markers in the QTL *Qphs.pseru-3AS* region

| No. of RSLs | Xbarc12 | XFE900150 | Xctg830728 | XBE424484 | XBE401794 | XCD910417 | XCA654295 | XAL815375 | Xctg30698 | XCJ575364 | XCJ550920 | XCJ551268 | XCJ952112 | XBE591959 | Xbarc57 | Xbarc321 | PHS rate |
|-------------|---------|-----------|------------|-----------|-----------|-----------|-----------|-----------|-----------|-----------|-----------|-----------|-----------|-----------|---------|----------|----------|
| 08F485      | A       | A         | A          | A         | A         | A         | A         | A         | A         | A         | A         | A         | A         | A         | A       | A        | L        |
| 1           | A       | A         | A          | A         | A         | A         | A         | A         | A         | A         | A         | A         | A         | A         | A       | B        | L        |
| 16          | B       | A         | A          | A         | A         | A         | A         | A         | A         | A         | A         | A         | A         | A         | A       | A        | L        |
| 1           | B       | A         | A          | A         | A         | A         | A         | A         | A         | A         | A         | A         | A         | A         | A       | B        | L        |
| 1           | B       | A         | A          | A         | A         | A         | A         | B         | B         | B         | B         | B         | B         | B         | B       | B        | L        |
| 1           | A       | A         | A          | A         | B         | B         | B         | B         | B         | B         | B         | B         | B         | B         | B       | B        | H        |
| 2           | A       | A         | B          | B         | B         | B         | B         | B         | B         | B         | B         | B         | B         | B         | B       | B        | H        |
| 3           | A       | B         | B          | B         | B         | B         | B         | B         | B         | B         | B         | B         | B         | B         | B       | A        | H        |
| 31          | A       | B         | B          | B         | B         | B         | B         | B         | B         | B         | B         | B         | B         | B         | B       | B        | H        |
| 08F481      | B       | B         | B          | B         | B         | B         | B         | B         | B         | B         | B         | B         | B         | B         | B       | B        | H        |

A=Rio Blanco genotype; B=NW97S186 genotype. L=low PHS rates as in NW97S186; H=high PHS rates as in Rio Blanco.

Those red letters are the markers co-segregated with *TaPHS1*.
