# Supplementary material
Source: PubMed Central journal article supplement (PMC3761307)
Supplement: 36632475b5a2bca120d0d63ce3731c1e_genetics.113.152330-8.pdf [file 36632475b5a2bca120d0d63ce3731c1e_genetics.113.152330-8.pdf]

**Table S3** Thirteen genes that were mapped in the QTL *Qphs.pseru-3AS* region by comparative mapping

| Wheat ESTs | Rice annotated genes  | <i>Branchypodium</i> annotated gene | Forward primer        | Reverse primer           | SNP primer*                |
|------------|-----------------------|-------------------------------------|-----------------------|--------------------------|----------------------------|
| XFE900150  | <i>LOC_Os01g15209</i> | <i>Bradi2g00780</i>                 | TTTTGTGCCCTCGTATGTTT  | AGCTGAACAATGGCGAAGAT     | -                          |
| Ctg830728  | <i>LOC_Os01g02050</i> | <i>Bradi 2g00910</i>                | CAACCTAGGCGGCAGTTTTA  | ACCGAGACgGGAATCCTAAT     | -                          |
| BE423484   | <i>LOC_Os01g02070</i> | no                                  | CCACGGTCTCGTCATTCTT   | TTTCGAAACGGAACTAGCC      | -                          |
| BE401794   | <i>LOC_Os01g02090</i> | <i>Bradi 2g00980</i>                | GGGCCATCTTGGTAGGAAAT  | TGCTCACCAGGCATGAGATA     | -                          |
| CD910417   | <i>LOC_Os01g02100</i> | <i>Bradi 2g00990</i>                | CATGCCTGTGAAGAGCTCAG  | AAGGTACGGGTGCAATGAAT     | AGCACTGGACTGAAGTT<br>TACCA |
| CA654295   | <i>LOC_Os01g02110</i> | <i>Bradi 2g01000</i>                | GTCCGAAGAGAGCGCATCA   | GGAGAATTGATCTAAAAGGAGTGA | -                          |
| AL815375   | <i>LOC_Os01g02130</i> | <i>Bradi 2g01030</i>                | CCCTCTCGCTGCTAACCAC   | GTACGTACACGCGCACCA       | -                          |
| Ctg30698   | no                    | <i>Bradi 2g01070</i>                | GTATTGCCAGCCCCTGACT   | GAACCCTGAGGGATGTCAAA     | -                          |
| CJ575364   | <i>LOC_Os01g02170</i> | <i>Bradi 2g01090</i>                | TCACTGCAACCAAAATTCTCA | GGTGTGCCTGCACTACCTCT     | -                          |
| CJ550920   | <i>LOC_Os01g02190</i> | <i>Bradi 2g01090</i>                | CGGCTAGCTGGCTAGTTCGT  | AAGGGCAGGACCTAGAGC       | -                          |
| CJ551268   | <i>LOC_Os01g02200</i> | <i>Bradi 2g01100</i>                | CGCTTATGATGGGCTTATTTG | ATCCTTGGGATTGCATCATC     | -                          |
| CJ952112   | <i>LOC_Os01g02300</i> | <i>Bradi 2g01120</i>                | ATCGGAAGCATTACCATGT   | GCCAGCTCAAGCATGTCTA      | -                          |
| BE591959   | <i>LOC_Os01g02310</i> | no                                  | TTTCAGGGTCAATTTGGTGA  | TTGCATAGTCCAAAATCAGAAA   | -                          |

\* indicates the gene that was mapped using the SNP marker.
