# Supplementary material
Source: PubMed Central journal article supplement (PMC3761307)
Supplement: b84532b447cf9a15e93a97600eabd6fe_genetics.113.152330-11.pdf [file b84532b447cf9a15e93a97600eabd6fe_genetics.113.152330-11.pdf]

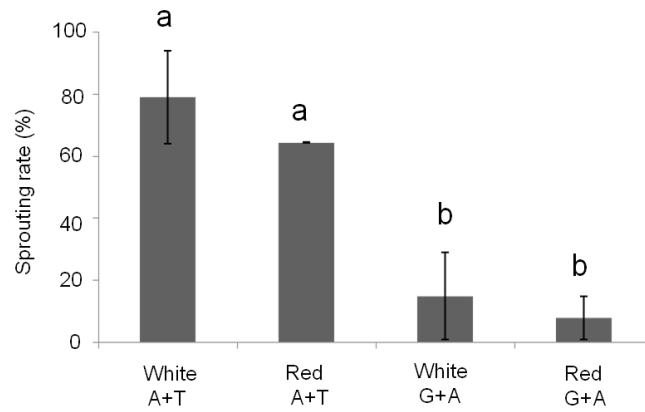

**Figure S7** Two causal SNPs determine PHS resistance. White wheat had slightly higher spike sprouting rates than red wheat in both haplotypes of *TaPHS1* based on the two causal SNPs loci (+646 and +666), but the difference was not significant (a and b indicate significant difference at  $P < 0.05$ ) as the two causal SNPs ( $P=2.98 \times 10^{-5}$ , Figure 5B).
