# Supplementary material
Source: PubMed Central journal article supplement (PMC3761307)
Supplement: bd8ed6eb9559356f50764bbe8e387cdb_genetics.113.152330-14.pdf [file bd8ed6eb9559356f50764bbe8e387cdb_genetics.113.152330-14.pdf]

**Table S4 Genes identified by sequencing the three BACs spanning the *Qphs.pseru-3AS* region**

| <i>Brachypodium</i> homologs | Rice homologs  | Predicted gene function                       |
|------------------------------|----------------|-----------------------------------------------|
| Bradi2g00950                 | LOC_Os01g02080 | Peptidyl-prolyl cis-trans isomerase           |
| Bradi2g00980                 | LOC_Os01g02090 | Uncharacterized mRNA-associated protein RAP55 |
| Bradi2g00990                 | LOC_Os01g02100 | Tm3 transposase                               |
| Bradi2g01000                 | LOC_Os01g02110 | HLH DNA-binding domain containing protein     |
| Bradi2g01010                 | no             | Cell division cycle                           |
| Bradi2g01020                 | LOC_Os01g02120 | Homologous to Mother of FT and TFL1 gene      |
