# Supplementary material
Source: PubMed Central journal article supplement (PMC3761307)
Supplement: d7b61b315cd7512f3f42bc88a38f038d_genetics.113.152330-6.pdf [file d7b61b315cd7512f3f42bc88a38f038d_genetics.113.152330-6.pdf]

**Table S5 Relationship among two structure groups, seed color, and causal SNPs for PHS resistance in *TaPHS1*.**

| Cultivars      | Seed color | Structure group | SNP at +646 | SNP at +666 |
|----------------|------------|-----------------|-------------|-------------|
| Trego          | white      | 1               | G           | A           |
| SD07W041       | white      | 1               | G           | A           |
| NW05M6015-25-4 | white      | 1               | G           | A           |
| KS07HW25       | white      | 1               | G           | A           |
| KS07HW81       | white      | 1               | G           | A           |
| Snowmass       | white      | 1               | G           | A           |
| OK Rising      | white      | 1               | G           | A           |
| Rio Blanco     | white      | 1               | G           | A           |
| Danby          | white      | 1               | G           | A           |
| Avalanche      | white      | 1               | G           | A           |
| CO05W101       | white      | 1               | G           | A           |
| Mesa           | white      | 1               | G           | A           |
| KS07HW52-5     | white      | 1               | G           | A           |
| NE08452        | red        | 1               | G           | A           |
| Jagger         | red        | 1               | G           | A           |
| Overland       | red        | 1               | G           | A           |
| Intrada        | white      | 1               | G           | A           |
| KS05HW136-3    | white      | 1               | G           | A           |
| CO02W237       | white      | 1               | G           | A           |
| CO03W139       | white      | 1               | G           | A           |
| KS05HW121-2    | white      | 1               | G           | A           |
| CO03W043       | white      | 1               | G           | A           |
| SD05W030       | white      | 1               | G           | A           |
| SD05W148-1     | white      | 1               | G           | A           |
| Tiger          | white      | 1               | G           | A           |
| Lakin          | white      | 1               | G           | A           |
| Hartog         | white      | 1               | G           | A           |
| KS010990M-8    | white      | 1               | G           | A           |
| Infinity CL    | red        | 1               | G           | A           |
| Thunder CL     | white      | 1               | G           | A           |
| Recital        | white      | 1               | G           | A           |
| NW03Y2016      | white      | 1               | G           | A           |
| OK Bullet      | red        | 1               | G           | A           |
| Postrock       | red        | 1               | G           | A           |
| Santa Fe       | red        | 1               | G           | A           |
| NX03Y2489      | white      | 1               | A           | T           |
| NX04Y2107      | white      | 1               | A           | T           |
| Antelope       | white      | 1               | A           | T           |
| KS05HW15-2     | white      | 1               | A           | T           |
| CO04W210       | white      | 1               | A           | T           |
| KS07HW117      | white      | 1               | A           | T           |
| RonL           | white      | 1               | A           | T           |
| NW97S078       | white      | 1               | A           | T           |

|                |       |   |   |   |
|----------------|-------|---|---|---|
| Grandin        | red   | 1 | A | T |
| CO03W054       | white | 2 | G | A |
| NW04Y2188      | white | 2 | G | A |
| Janz           | white | 2 | G | A |
| Spica          | white | 2 | G | A |
| Overlay        | red   | 2 | G | A |
| Jackpot        | red   | 2 | G | A |
| Jagalene       | red   | 2 | G | A |
| AC Taber       | red   | 2 | G | A |
| ZenkojiKomugi  | red   | 2 | G | A |
| Bobwhite       | red   | 2 | G | A |
| Karl92         | red   | 2 | G | A |
| Chinese Spring | red   | 2 | G | A |
| Aus1408        | white | 2 | G | A |
| Bungulla       | white | 2 | G | A |
| NW96S016       | white | 2 | G | A |
| TutoumaiA      | white | 2 | G | A |
| Betty          | white | 2 | G | A |
| Champlain      | white | 2 | G | A |
| Halberd        | white | 2 | G | A |
| Jabim          | white | 2 | G | A |
| Kite           | white | 2 | G | A |
| Lerma Rojo     | white | 2 | G | A |
| Siyang936      | white | 2 | G | A |
| 2137           | red   | 2 | G | A |
| Bill Brown     | red   | 2 | G | A |
| Hatcher        | red   | 2 | G | A |
| Losprout       | red   | 2 | G | A |
| Heyne          | white | 2 | G | A |
| 99ID536        | white | 2 | G | A |
| Protection CL  | red   | 2 | G | A |
| Renan          | red   | 2 | G | A |
| Jing411        | white | 2 | A | T |
| NW05M6011-6-1  | white | 2 | A | T |
| NW97S186       | white | 2 | A | T |
| John           | white | 2 | A | T |
| Klasic         | white | 2 | A | T |
| Geneva         | white | 2 | A | T |
| Xinchun9       | white | 2 | A | T |
